# Supplementary material
Source: PubMed Central journal article supplement (PMC3422372)

Supp. Figure 1

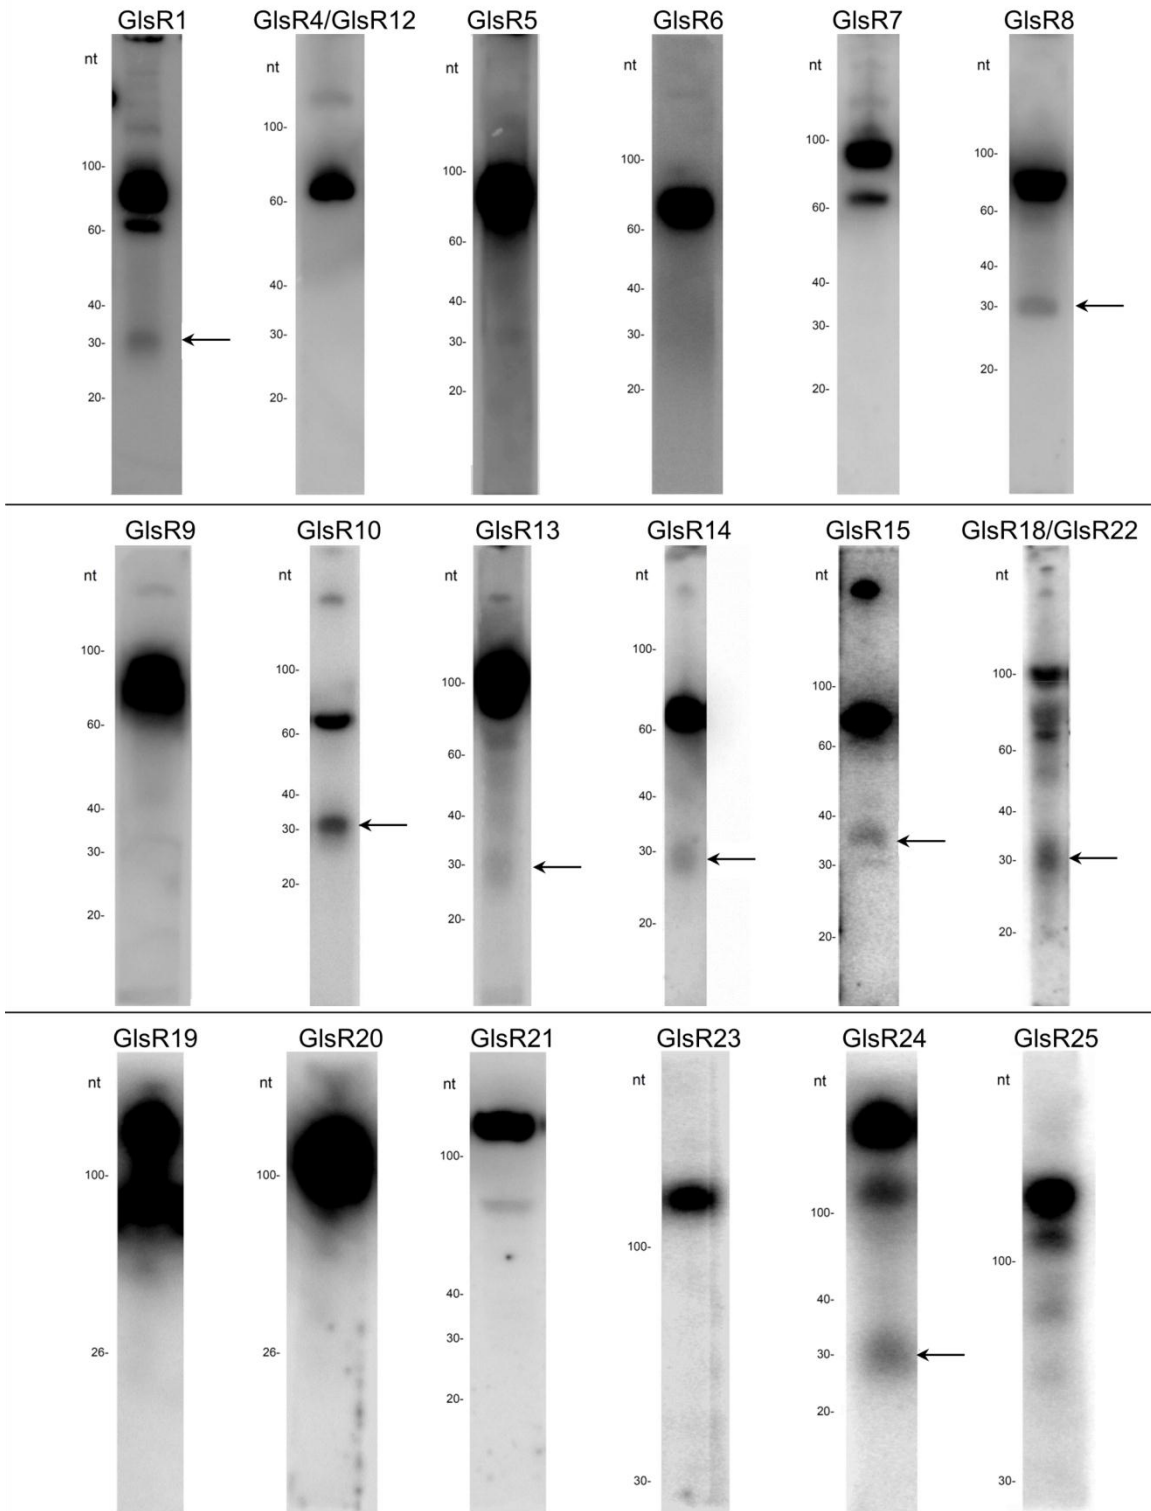

Supp. Figure 2

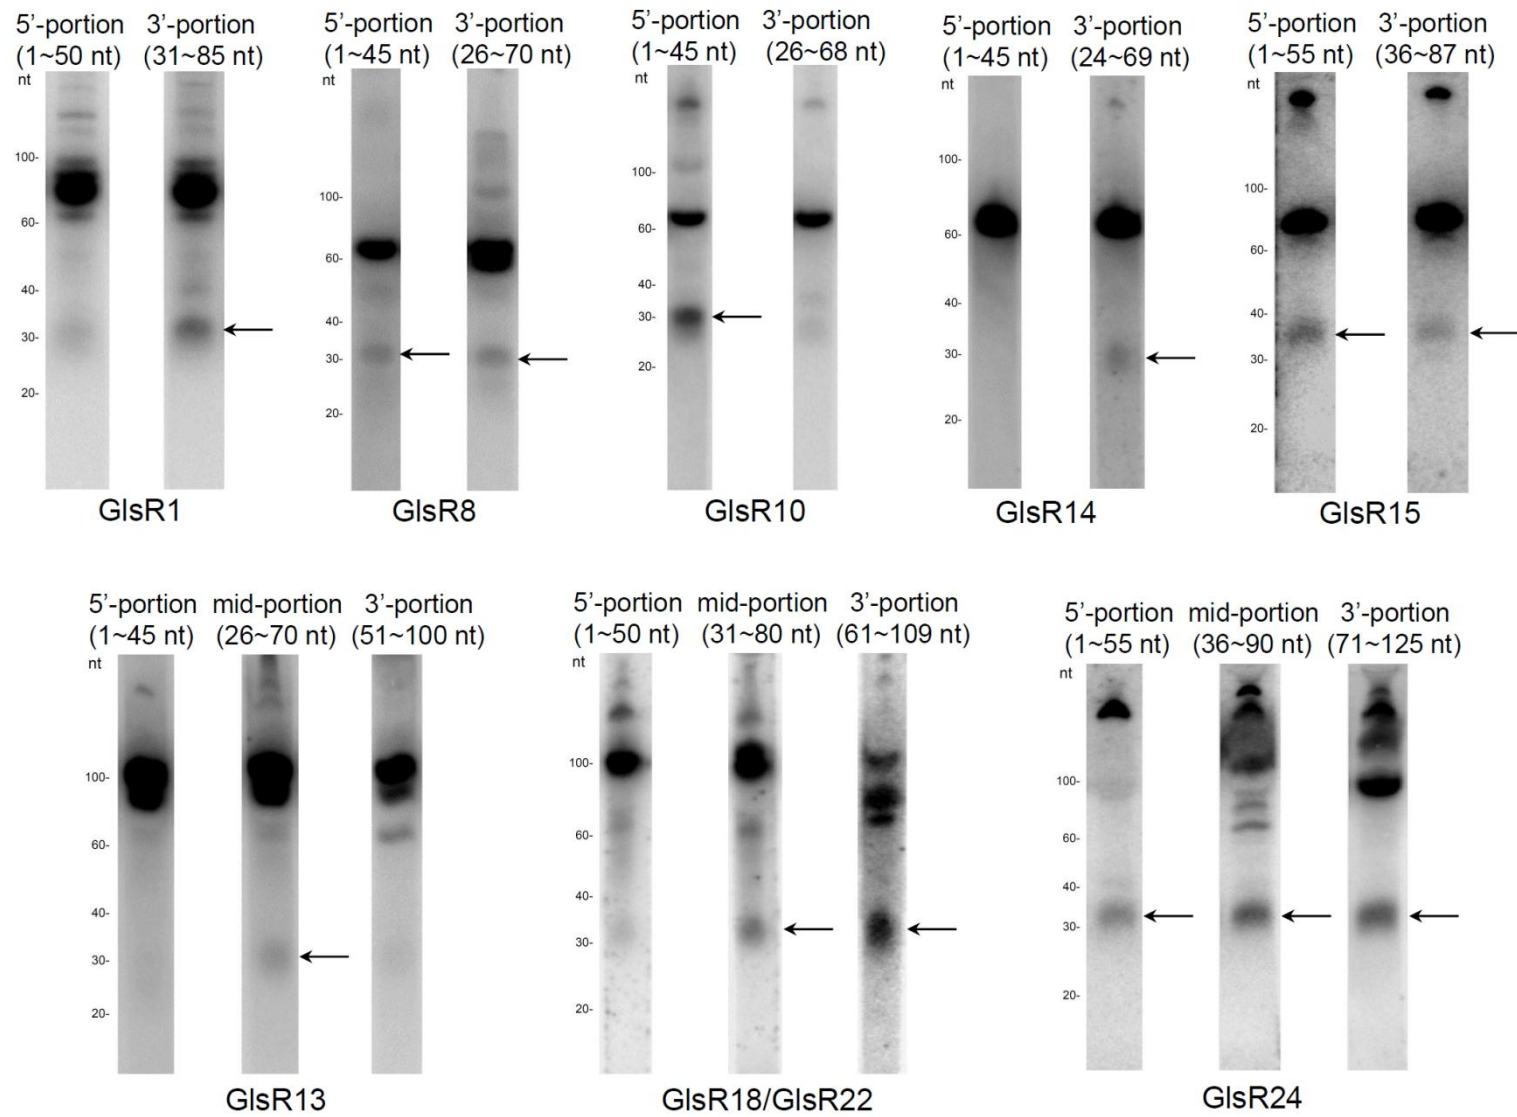

### Supp. Figure 3

(A)

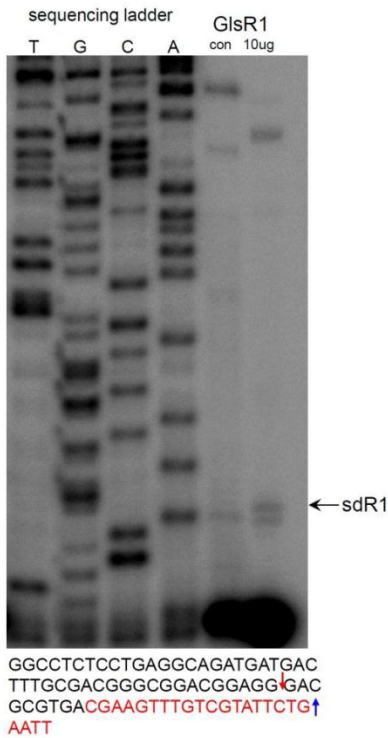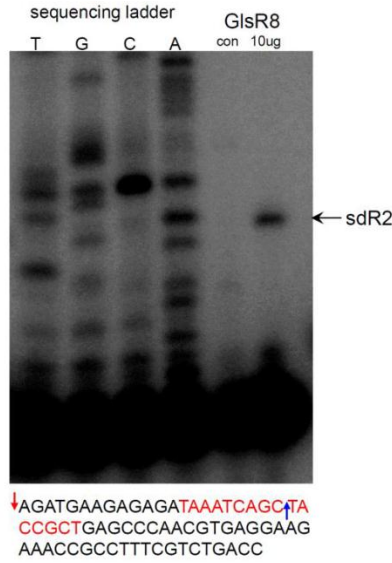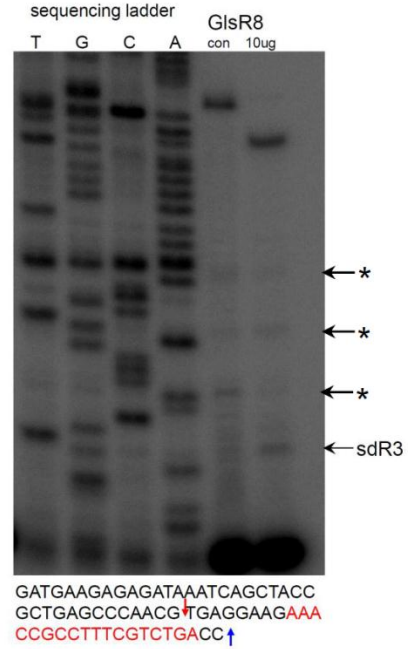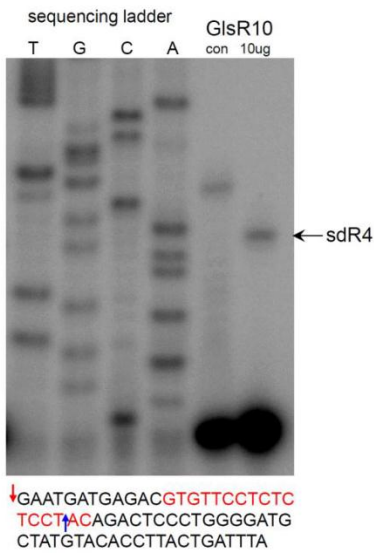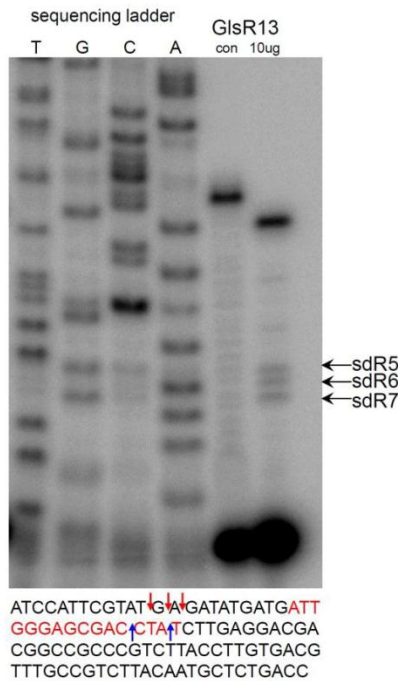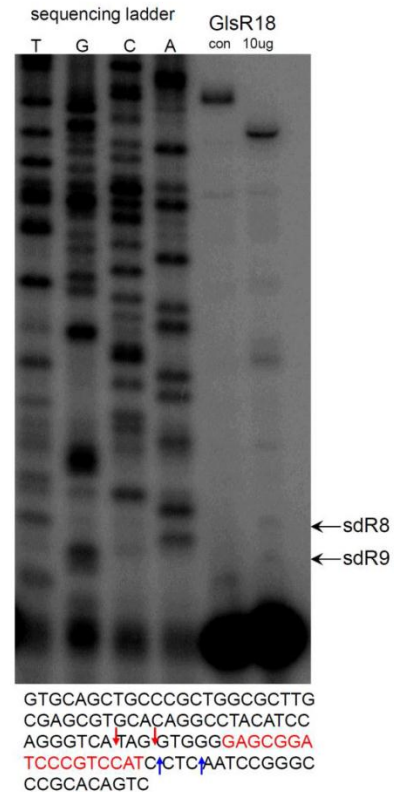

(B)

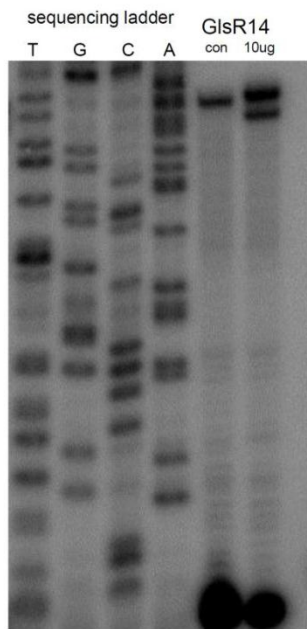

AATAAAATGATGACAATGCGCATT  
GTCAGAAGGCTCACTTCTGATGAT  
TCCTCTGTCATTCCCTGATCCT

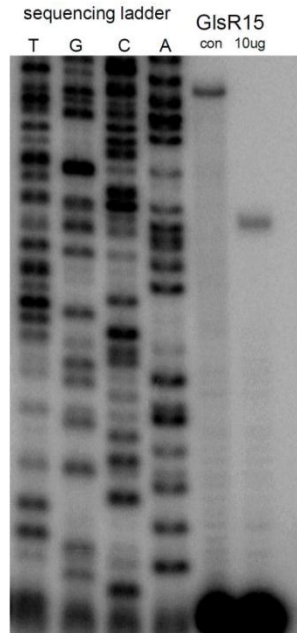

CAGAATGATTATCTGTCTCCGA  
GCAAGCACGACTATGAGCTTAC  
TTATGAGATCTGACTCC

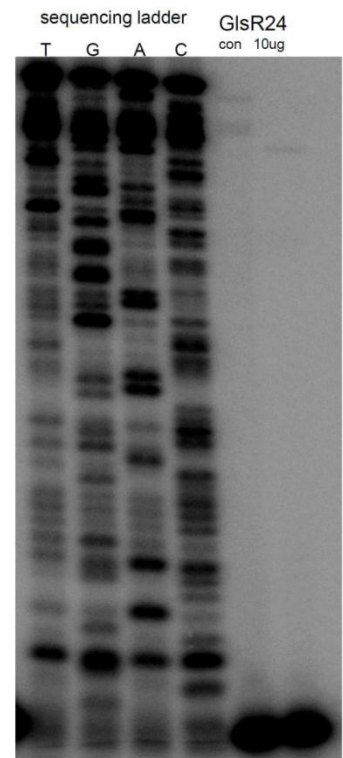

GGCAGTCCTTGCCCGCGGAGGGCAC  
TTAAGGCTCCGGGGCCCGGGGCAGA  
GTCGGCCTCCAGAGCCCGCCGAC  
GCCCCGAGCGCCAGCCCGGCGCAG  
GGGCCGGCCACTC

Supp. Figure 4

(A)

| Small RNA | C <sub>T</sub> Vaule |       |
|-----------|----------------------|-------|
|           | control              | GIago |
| sdR1      | N/A                  | 34.71 |
| sdR2      | 38.50                | 37.14 |
| sdR3      | N/A                  | 29.97 |
| sdR4      | N/A                  | N/A   |
| sdR5      | 36.31                | 34.18 |
| sdR6      | N/A                  | N/A   |
| sdR7      | N/A                  | N/A   |
| sdR8      | N/A                  | 28.81 |
| sdR9      | 39.95                | 38.32 |

(B)

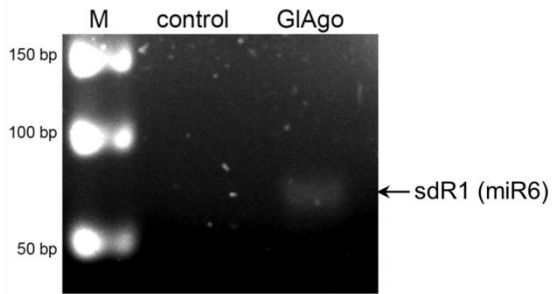

(C)

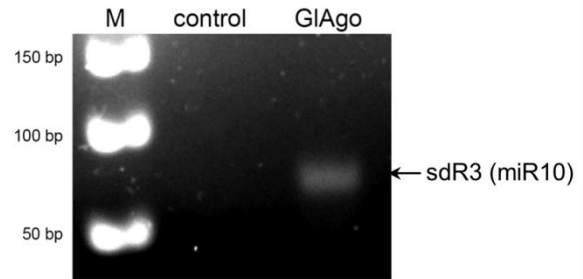

**Supp. Figure 5**

**(A)**

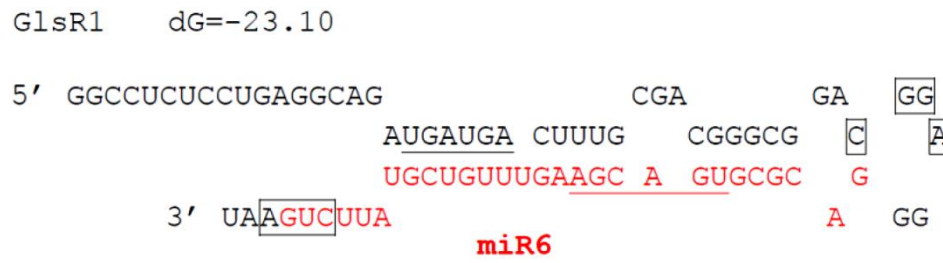

**(B)**

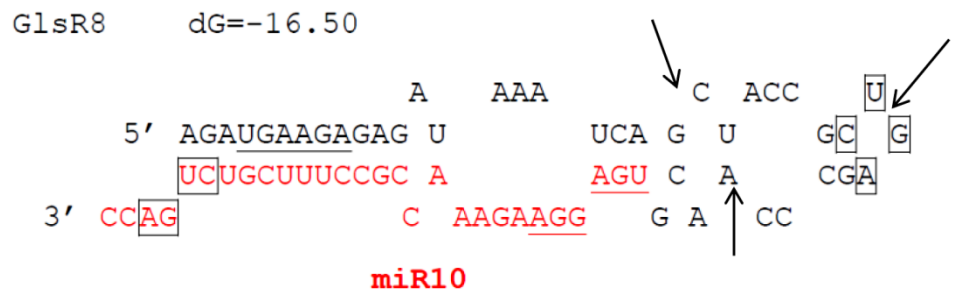

**(C)**

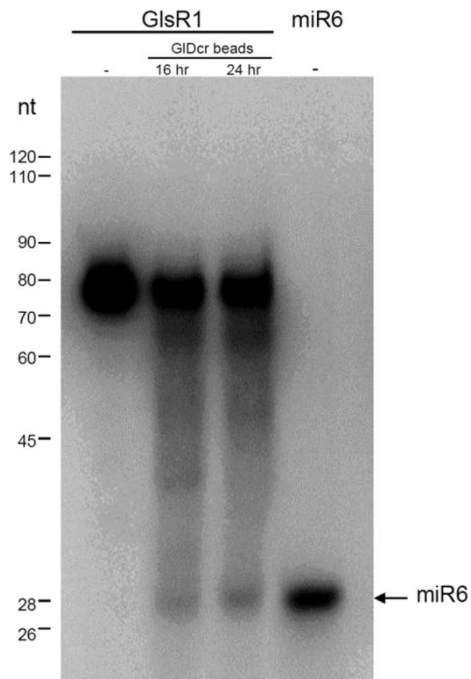

**(D)**

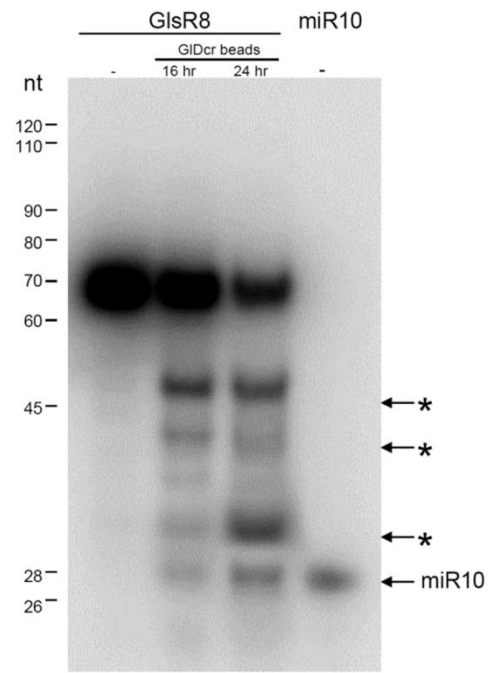

**Supp. Figure 6**

**(A)**

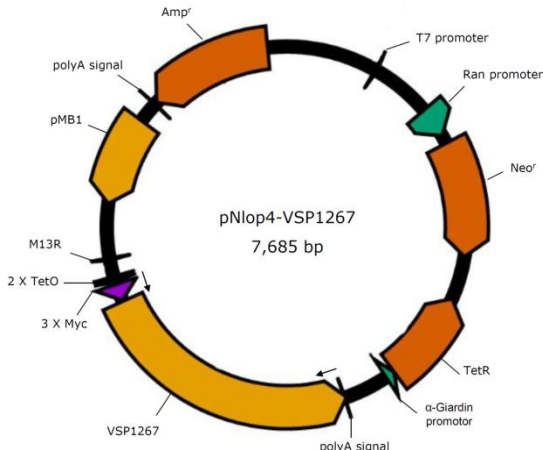

**(B)**

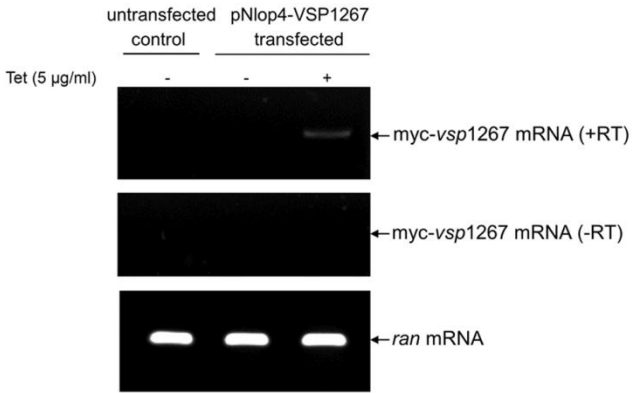

**(C)**

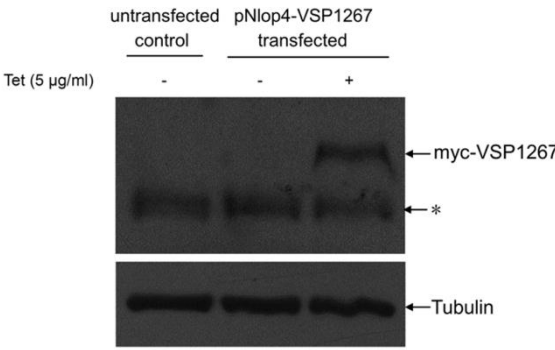

**(D)**

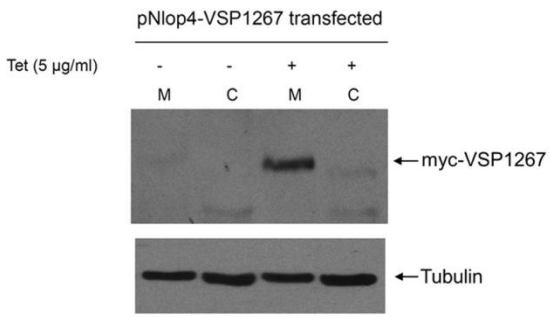

**(E)**

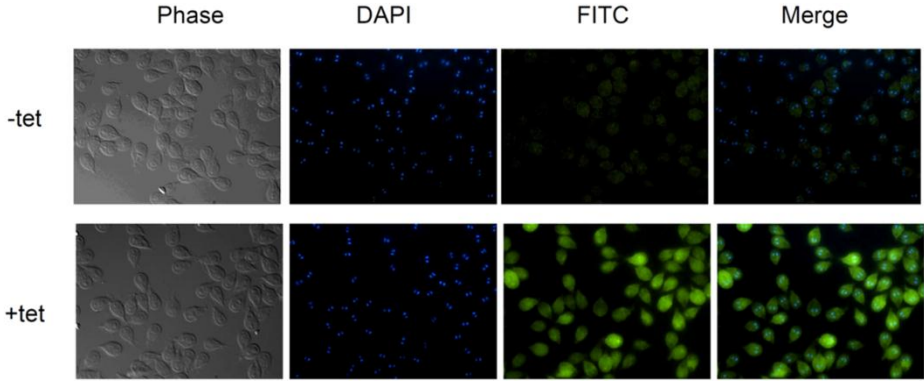

**Supp. Figure 7**

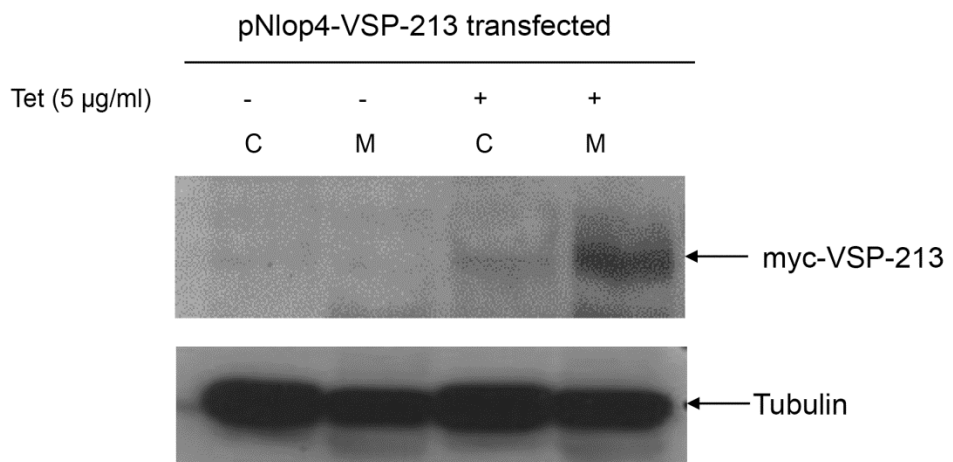

Supplement: NIHMS375031-supplement-Supp_Fig_S1-S7.pdf [file NIHMS375031-supplement-Supp_Fig_S1-S7.pdf]
